# Supplementary material for: Post-Marketing Safety Study of Ramucirumab Plus FOLFIRI: Analysis of Age and Initial Dose of Irinotecan in Patients with Metastatic Colorectal Cancer
Source: Springer Nature journal article supplement (doi:10.1007/s40801-023-00366-2), 2023-04-27

## **Supplementary Material**

### **Drugs – Real World Outcomes**

**Title:** Post-marketing safety study of ramucirumab plus FOLFIRI: Analysis of age and initial dose of irinotecan in patients with metastatic colorectal cancer

**Running title:** Ramucirumab plus FOLFIRI treatment for metastatic colorectal cancer in clinical practice

**Authors:** Toshiki Masuishi<sup>1</sup>, Soshi Nagaoka<sup>2</sup>, Long Jin<sup>2</sup>, Kenichi Yoshizawa<sup>2</sup>

**Affiliation:** <sup>1</sup>Department of Clinical Oncology, Aichi Cancer Center Hospital, Nagoya, Japan

<sup>2</sup>Eli Lilly Japan K.K., Kobe, Japan

**Corresponding author:** Kenichi Yoshizawa, Eli Lilly Japan K.K., Lilly Plaza One Building, 5-1-28 Isogamidori, Chuo-Ku, Kobe, Hyogo 651-0086, Japan; Phone: +81 (78) 2429111; Email: [yoshizawa\\_kenichi@lilly.com](mailto:yoshizawa_kenichi@lilly.com)

Table S1: Patient demographics and baseline clinical characteristics by age

| Characteristic                                 | Age                |                    |                    |                    |
|------------------------------------------------|--------------------|--------------------|--------------------|--------------------|
|                                                | <65 years<br>N=144 | ≥65 years<br>N=218 | <70 years<br>N=232 | ≥70 years<br>N=130 |
| Sex                                            |                    |                    |                    |                    |
| Male                                           | 74 (51.4)          | 126 (57.8)         | 122 (52.6)         | 78 (60.0)          |
| Female                                         | 70 (48.6)          | 92 (42.2)          | 110 (47.4)         | 52 (40.0)          |
| Age, years, mean (SD)                          | 53.2 (8.3)         | 71.4 (4.5)         | 58.5 (9.4)         | 74.3 (3.5)         |
| Age, median (minimum – maximum)                | 55.0 (32-64)       | 70.0 (65-83)       | 61.0 (32-69)       | 74.0 (70-83)       |
| Body mass index, kg/m <sup>2</sup> , mean (SD) | 22.6 (4.4)         | 22.2 (3.6)         | 22.6 (4.2)         | 22.0 (3.3)         |
| RAS (K/NRAS) gene mutation                     |                    |                    |                    |                    |
| No                                             | 60 (41.7)          | 91 (41.7)          | 93 (40.1)          | 58 (44.6)          |
| Yes                                            | 82 (56.9)          | 120 (55.1)         | 136 (58.6)         | 66 (50.8)          |
| Unknown                                        | 2 (1.4)            | 7 (3.2)            | 3 (1.3)            | 6 (4.6)            |
| Primary tumor site <sup>a</sup>                |                    |                    |                    |                    |
| Ascending colon                                | 25 (17.4)          | 54 (24.8)          | 44 (19.0)          | 35 (26.9)          |
| Transverse colon                               | 9 (6.3)            | 17 (7.8)           | 15 (6.5)           | 11 (8.5)           |
| Descending colon                               | 10 (6.9)           | 10 (4.6)           | 15 (6.5)           | 5 (3.9)            |
| Sigmoid colon                                  | 38 (26.4)          | 43 (19.7)          | 57 (24.6)          | 24 (18.5)          |
| Rectal                                         | 65 (45.1)          | 101 (46.3)         | 106 (45.7)         | 60 (46.2)          |
| Metastasis and recurrent sites <sup>a</sup>    |                    |                    |                    |                    |
| Liver                                          | 86 (59.7)          | 142 (65.1)         | 144 (62.1)         | 84 (64.6)          |
| Lung                                           | 68 (47.2)          | 114 (52.3)         | 118 (50.9)         | 64 (49.2)          |
| Local                                          | 8 (5.6)            | 14 (6.4)           | 13 (5.6)           | 9 (6.9)            |

|                                                       |           |            |            |           |
|-------------------------------------------------------|-----------|------------|------------|-----------|
| Peritoneal (with ascites)                             | 19 (13.2) | 18 (8.3)   | 25 (10.8)  | 12 (9.2)  |
| Peritoneal (without ascites)                          | 24 (16.7) | 29 (13.3)  | 35 (15.1)  | 18 (13.9) |
| Bone                                                  | 14 (9.7)  | 18 (8.3)   | 22 (9.5)   | 10 (7.7)  |
| Brain                                                 | 1 (0.7)   | 2 (0.9)    | 2 (0.9)    | 1 (0.8)   |
| Lymph nodes (intra-peritoneally)                      | 55 (38.2) | 67 (30.7)  | 91 (39.2)  | 31 (23.9) |
| Lymph nodes (other)                                   | 18 (12.5) | 18 (8.3)   | 25 (10.8)  | 11 (8.5)  |
| Other                                                 | 7 (4.9)   | 8 (3.7)    | 9 (3.9)    | 6 (4.6)   |
| Eastern Cooperative Oncology Group performance status |           |            |            |           |
| 0                                                     | 91 (63.2) | 137 (62.8) | 150 (64.7) | 78 (60.0) |
| 1                                                     | 49 (34.0) | 72 (33.0)  | 76 (32.8)  | 45 (34.6) |
| 2                                                     | 4 (2.8)   | 9 (4.1)    | 6 (2.6)    | 7 (5.4)   |

Data are n (%) unless otherwise indicated.

<sup>a</sup>Patients could have more than one site.

SD, standard deviation.

Table S2. Use of ramucirumab by age

| <b>Parameter</b>                        | <b>Age &lt;65 years<br/>N=144</b> | <b>Age ≥65 years<br/>N=215</b> | <b>Age &lt;70 years<br/>N=232</b> | <b>Age ≥70 years<br/>N=127</b> |
|-----------------------------------------|-----------------------------------|--------------------------------|-----------------------------------|--------------------------------|
| Number of cycles<br>(1 cycle = 14 days) | 8.0 (1-32)                        | 8.0 (1-34)                     | 8.5 (1-32)                        | 7.0 (1-34)                     |
| Duration of treatment (weeks)           | 17.4 (2-65)                       | 16.0 (2-68)                    | 17.9 (2-65)                       | 14.0 (2-68)                    |
| Cumulative dose (mg/kg)                 | 44.8 (5-247)                      | 39.0 (6-199)                   | 44.6 (5-247)                      | 32.0 (7-199)                   |
| Dose intensity (mg/kg/week)             | 3.0 (1.0-4.4)                     | 2.8 (0.9-4.4)                  | 3.0 (0.9-4.4)                     | 2.8 (1.1-4.3)                  |
| Relative dose intensity (%)             | 76.1 (25.1-109.6)                 | 70.4 (21.5-109.5)              | 74.5 (21.5-109.6)                 | 70.3 (26.1-106.2)              |

Data presented as median (minimum-maximum).

Table S3. Use of FOLFIRI/Levofolinate by age

| <b>Parameter</b>                         | <b>Age &lt;65 years<br/>N=144</b> | <b>Age ≥65 years<br/>N=218</b> | <b>Age &lt;70 years<br/>N=232</b> | <b>Age ≥70 years<br/>N=130</b> |
|------------------------------------------|-----------------------------------|--------------------------------|-----------------------------------|--------------------------------|
| Number of cycles<br>(1 cycle = 14 days)  | 8.0 (1-32)                        | 8.0 (1-34)                     | 8.0 (1-32)                        | 7.0 (1-34)                     |
| Duration of treatment (weeks)            | 17.0 (2-65)                       | 16.0 (2-68)                    | 17.9 (2-65)                       | 14.0 (2-68)                    |
| Cumulative dose (mg/m <sup>2</sup> )     | 1325.0 (194-6720)                 | 1000.0 (0-8125)                | 1232.0 (160-6720)                 | 960.0 (0-8125)                 |
| Dose intensity (mg/m <sup>2</sup> /week) | 84.2 (11.8-191.3)                 | 76.5 (0-170.0)                 | 80.5 (11.8-191.3)                 | 75.0 (0-170.0)                 |
| Relative dose intensity (%)              | 84.2 (11.8-191.3)                 | 76.5 (0-170.0)                 | 80.5 (11.8-191.3)                 | 75.0 (0-170.0)                 |

Data presented as median (minimum-maximum).

FOLFIRI, fluorouracil, levofolinate, and irinotecan.

Table S4. Use of FOLFIRI/irinotecan by age

| <b>Parameter</b>                            | <b>Age &lt;65 years<br/>N=144</b> | <b>Age ≥65 years<br/>N=218</b> | <b>Age &lt;70 years<br/>N=232</b> | <b>Age ≥70 years<br/>N=130</b> |
|---------------------------------------------|-----------------------------------|--------------------------------|-----------------------------------|--------------------------------|
| Number of cycles<br>(1 cycle = 14<br>days)  | 8.0 (1-32)                        | 8.0 (1-34)                     | 8.0 (1-32)                        | 7.0 (1-34)                     |
| Duration of<br>treatment (weeks)            | 17.0 (2-65)                       | 16.0 (2-68)                    | 17.9 (2-65)                       | 14.0 (2-68)                    |
| Cumulative dose<br>(mg/m <sup>2</sup> )     | 840.0 (77-5760)                   | 696.5 (95-5320)                | 826.0 (77-5760)                   | 640.0 (1000-<br>5320)          |
| Dose intensity<br>(mg/m <sup>2</sup> /week) | 58.0 (18.0-<br>140.0)             | 50.2 (14.4-<br>143.6)          | 56.3 (14.4-<br>143.6)             | 48.0 (16.0-<br>125.0)          |
| Relative dose<br>intensity (%)              | 77.8 (25.7-<br>103.8)             | 69.4 (24.0-<br>114.7)          | 74.7 (24.0-<br>113.5)             | 69.6 (24.6-<br>114.7)          |

Data presented as median (minimum-maximum).

FOLFIRI, fluorouracil, levofolinate, and irinotecan.

Table S5. Use of FOLFIRI/Levofolinate/Fluorouracil by age

| <b>Parameter</b>                            | <b>Age &lt;65 years<br/>N=144</b> | <b>Age ≥65 years<br/>N=218</b> | <b>Age &lt;70 years<br/>N=232</b> | <b>Age ≥70 years<br/>N=130</b> |
|---------------------------------------------|-----------------------------------|--------------------------------|-----------------------------------|--------------------------------|
| Number of cycles<br>(1 cycle = 14<br>days)  | 8.0 (1-32)                        | 8.0 (1-34)                     | 8.0 (1-32)                        | 7.0 (1-34)                     |
| Duration of<br>treatment (weeks)            | 17.0 (2-65)                       | 16.0 (2-68)                    | 17.9 (2-65)                       | 14.0 (2-68)                    |
| Cumulative dose<br>(mg/m <sup>2</sup> )     | 15050.0 (1593-<br>108000)         | 12380.0 (0-<br>87000)          | 14400.0 (1536-<br>108000)         | 11760.0 (0-<br>87000)          |
| Dose intensity<br>(mg/m <sup>2</sup> /week) | 1067.7 (117.7-<br>2837.0)         | 863.2 (0-2290.0)               | 1021.0 (117.7-<br>2837.0)         | 822.2 (0-2050.0)               |
| Relative dose<br>intensity (%)              | 76.3 (8.4-202.6)                  | 61.7 (0-163.6)                 | 72.9 (8.4-202.6)                  | 58.7 (0-146.4)                 |

Data presented as median (minimum-maximum).

FOLFIRI, fluorouracil, levofolinate, and irinotecan.

Table S6. Notable adverse events by age

|                                | Age <65 years<br>N=144 |                 | Age ≥65 years<br>N=218 |                 | Age <70 years<br>N=232 |                 | Age ≥70 years<br>N=130 |                 |
|--------------------------------|------------------------|-----------------|------------------------|-----------------|------------------------|-----------------|------------------------|-----------------|
| Any AE, n (%)                  | 120 (83.3)             |                 | 185 (84.9)             |                 | 195 (84.1)             |                 | 110 (84.6)             |                 |
| Grade ≥3 AE, n (%)             | 70 (48.6)              |                 | 115 (52.8)             |                 | 114 (49.1)             |                 | 71 (54.6)              |                 |
| SAE, n (%)                     | 22 (15.3)              |                 | 50 (22.9)              |                 | 38 (16.4)              |                 | 34 (26.2)              |                 |
|                                | <b>Any grade</b>       | <b>Grade ≥3</b> |
| Neutropenia                    | 57 (39.6)              | 39 (27.1)       | 93 (42.7)              | 62 (28.4)       | 97 (41.8)              | 64 (27.6)       | 53 (40.8)              | 37 (28.5)       |
| Proteinuria                    | 28 (19.4)              | 8 (5.6)         | 36 (16.5)              | 15 (6.9)        | 46 (19.8)              | 15 (6.5)        | 18 (13.9)              | 8 (6.2)         |
| Hypertension                   | 29 (20.1)              | 15 (10.4)       | 30 (13.8)              | 20 (9.2)        | 40 (17.2)              | 21 (9.1)        | 19 (14.6)              | 14 (10.8)       |
| Leukopenia                     | 16 (11.1)              | 3 (2.1)         | 21 (9.6)               | 6 (2.8)         | 27 (11.6)              | 5 (2.2)         | 10 (7.7)               | 4 (3.1)         |
| Liver injury/failure           | 18 (12.5)              | 10 (6.9)        | 10 (4.6)               | 5 (2.3)         | 25 (10.8)              | 14 (6.0)        | 3 (2.3)                | 1 (0.8)         |
| Bleeding/haemorrhagic events   | 10 (6.9)               | 2 (1.4)         | 14 (6.4)               | 1 (0.5)         | 15 (6.5)               | 2 (0.9)         | 9 (6.9)                | 1 (0.8)         |
| Febrile neutropenia            | 3 (2.1)                | 3 (2.1)         | 7 (3.2)                | 7 (3.2)         | 7 (3.0)                | 7 (3.0)         | 3 (2.3)                | 3 (2.3)         |
| Venous thromboembolic events   | 2 (1.4)                | 1 (0.7)         | 6 (2.8)                | 2 (0.9)         | 3 (1.3)                | 2 (0.9)         | 5 (3.9)                | 1 (0.8)         |
| Interstitial lung disease      | 2 (1.4)                | 1 (0.7)         | 3 (1.4)                | 1 (0.5)         | 4 (1.7)                | 1 (0.4)         | 1 (0.8)                | 1 (0.8)         |
| Infusion-related reaction      | 2 (1.4)                | 0 (0.0)         | 2 (0.9)                | 0 (0.0)         | 3 (1.3)                | 0 (0.0)         | 1 (0.8)                | 0 (0.0)         |
| Gastrointestinal perforation   | 2 (1.4)                | 2 (1.4)         | 1 (0.5)                | 1 (0.5)         | 2 (0.9)                | 2 (0.9)         | 1 (0.8)                | 1 (0.8)         |
| Arterial thromboembolic events | 0 (0.0)                | 0 (0.0)         | 2 (0.9)                | 1 (0.5)         | 0 (0.0)                | 0 (0.0)         | 2 (1.5)                | 1 (0.8)         |
| Congestive heart failure       | 0 (0.0)                | 0 (0.0)         | 1 (0.5)                | 1 (0.5)         | 1 (0.4)                | 1 (0.4)         | 0 (0.0)                | 0 (0.0)         |

|                       |         |         |         |         |         |         |         |         |
|-----------------------|---------|---------|---------|---------|---------|---------|---------|---------|
| Healing complications | 0 (0.0) | 0 (0.0) | 1 (0.5) | 0 (0.0) | 0 (0.0) | 0 (0.0) | 1 (0.8) | 0 (0.0) |
|-----------------------|---------|---------|---------|---------|---------|---------|---------|---------|

---

MedDRA version 23.0.

AE, adverse event; MedDRA, Medical Dictionary for Regulatory Activities; SAE, serious adverse event.



**Fig. S1** Survival analysis generated using the Kaplan-Meier method by **a.** patients aged <65 and ≥65 years and **b.** patients aged <70 and ≥70 years

The number of deaths/censored are presented as n (%). Survival time is presented as point estimate (95% CI).

<sup>a</sup>Censored at the last date when the survival status was confirmed. CI, confidence interval.

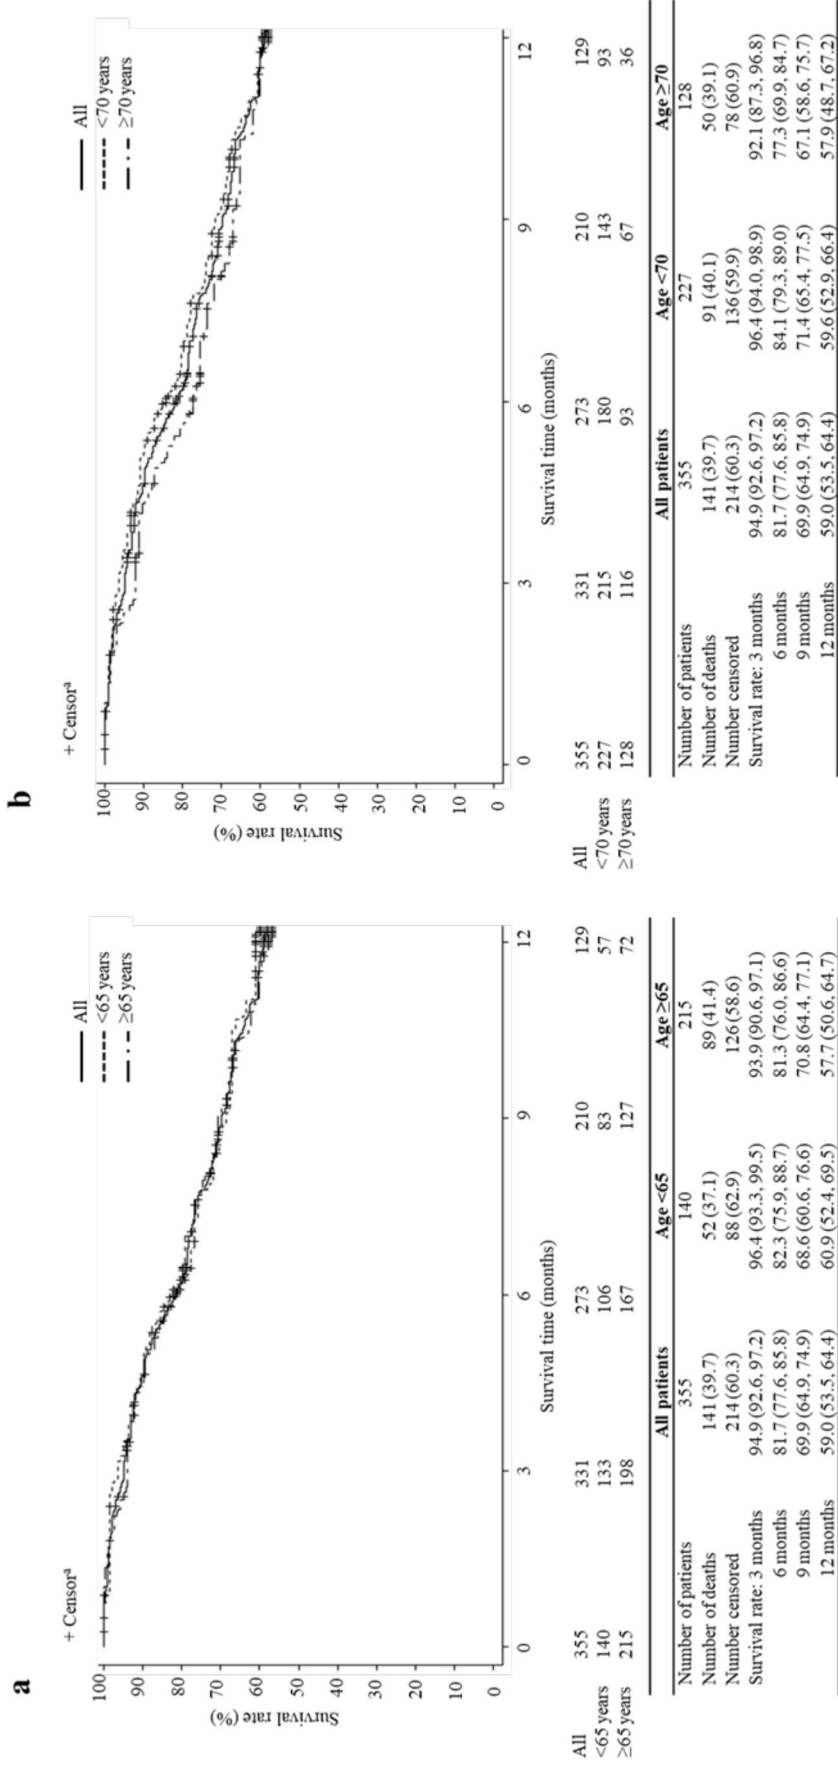

Supplement: MOESM1 [file 25291176]
